# Supplementary material for: Excellent catalysis of Mn3O4 nanoparticles on the hydrogen storage properties of MgH2: an experimental and theoretical study
Source: Royal Society of Chemistry journal article supplement (doi:10.1039/d0na00137f), 2020-01-01
Supplement: d0na00137f1.pdf [file d0na00137f1.pdf]

## Electronic Supplementary Material

### Excellent catalysis of $\text{Mn}_3\text{O}_4$ nanoparticles on the hydrogen storage properties of $\text{MgH}_2$ : An experimental and theoretical study

Liuting Zhang<sup>a,§</sup>, Ze Sun<sup>a,§</sup>, Zhendong Yao<sup>a,§</sup>, Lei Yang<sup>a</sup>, Nianhua Yan<sup>a</sup>, Xiong

Lu<sup>a</sup>, Beibei Xiao<sup>a</sup>, Xinqiao Zhu<sup>b,\*</sup> and Lixin Chen<sup>c,\*</sup>

<sup>a</sup> College of Energy and Power, Jiangsu University of Science and Technology, Zhenjiang 212003, PR. China

<sup>b</sup> Institute of Nuclear Physics and Chemistry, China Academy of Engineering Physics, Mianyang 621999, PR. China

<sup>c</sup> State Key Laboratory of Silicon Materials, Department of Materials Science and Engineering, Zhejiang University, Hangzhou 310027, PR. China

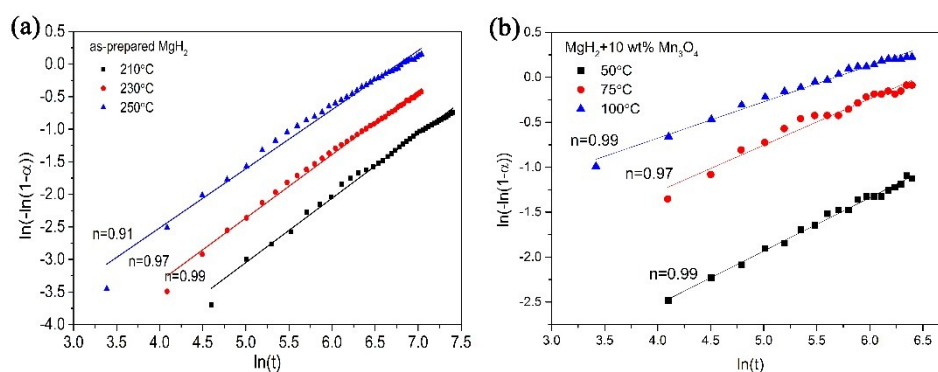

Fig.S1 JMAK plots of  $\text{MgH}_2$  and  $\text{MgH}_2+10 \text{ wt\% Mn}_3\text{O}_4$  composite.

\* To whom correspondence should be addressed. Tel: +86 17738406685; E-mail address: [zhuxinqiao@zju.edu.cn](mailto:zhuxinqiao@zju.edu.cn), [lxchen@zju.edu.cn](mailto:lxchen@zju.edu.cn)

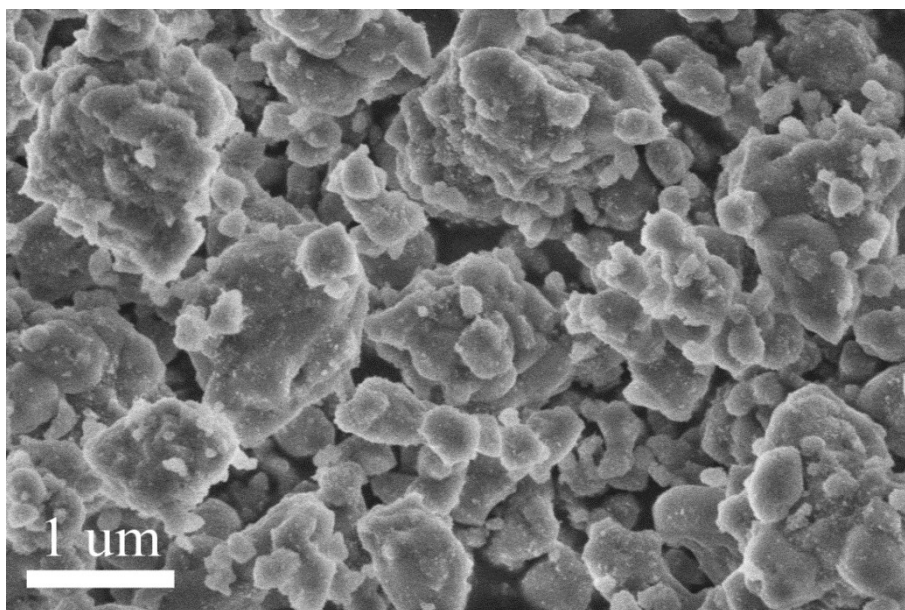

Fig.S2 SEM image of as-prepared  $\text{MgH}_2$ .

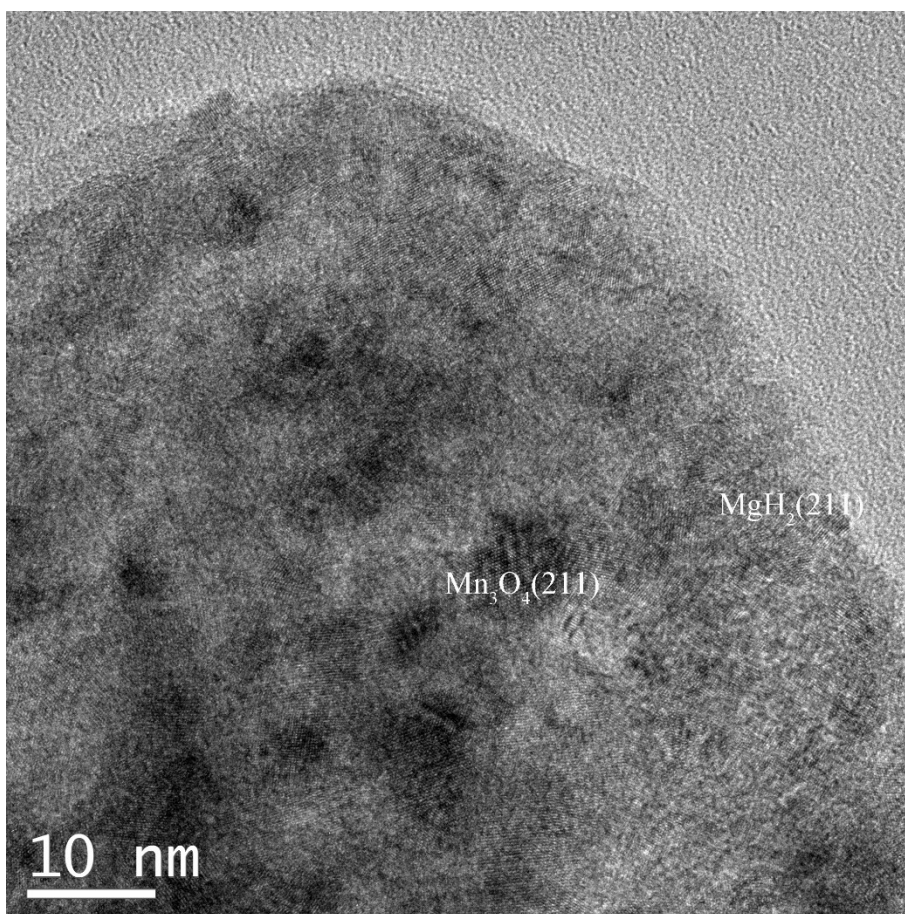

Fig.S3 TEM image of  $\text{MgH}_2$ +10 wt%  $\text{Mn}_3\text{O}_4$  composite in ball-milling state.

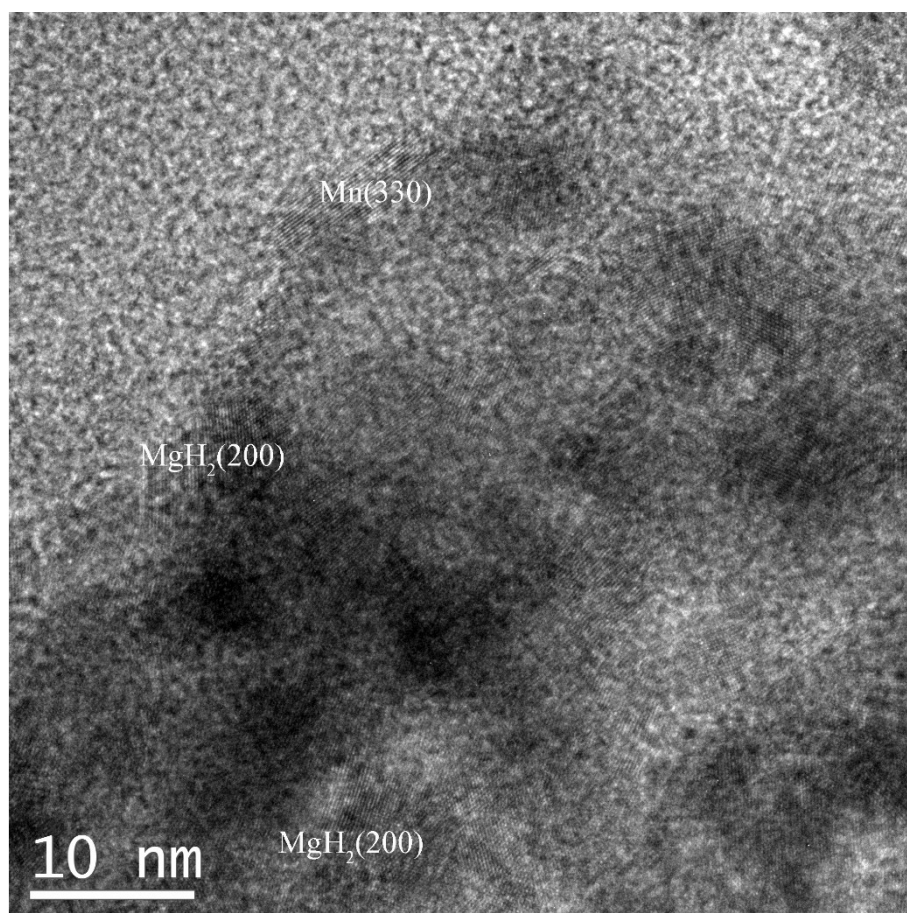

Fig.S4 TEM image of  $\text{MgH}_2 + 10 \text{ wt\% Mn}_3\text{O}_4$  composite after 20 cycles.
